# Supplementary material for: Deforestation and Biomass Production in Miombo Forest in Huambo (Angola): A Balance between Local and Global Needs
Source: MDPI journal article supplement (doi:10.3390/f12111557), 2021-11-11
Supplement: s1 [file s1]

Type of the Paper (Article)

# Deforestation and biomass production in Miombo forest in Huambo (Angola): A balance between local and global needs

## SUPPLEMENTARY MATERIAL

**Table S1.** Identified species with local, scientific names and frequency of each specie.

| N. | Local name      | Scientific name                                   | Frequency (%) |
|----|-----------------|---------------------------------------------------|---------------|
| 1  | Ossese          | <i>Albizia anthunesiana</i> Harms                 | 12.94         |
| 2  | Loengo          | <i>Anisophyllea boehmii</i> Engl.                 | 5.86          |
| 3  | -               | <i>Bobgunnia madagascariensis</i> (Desy) J. H.    | 1.41          |
| 4  | Ussamba         | <i>Brachystegia boemii</i> Taub                   | 7.85          |
| 5  | Omanda          | <i>Brachystegia spiciformis</i> Benth             | 12.28         |
| 6  | Ossassa         | <i>Brachystegia tamarindoides</i> Benth           | 2.97          |
| 7  | -               | <i>Brachystegia utilis</i>                        | 0.41          |
| 8  | Ussombiambia    | <i>Cassia abbreviata</i>                          | 0.09          |
| 9  | Ondeka          | <i>Combretum collinum</i> Fresen.                 | 1.82          |
| 10 | Otchindjole     | <i>Diplorynchus condylocarpon</i> Mull. Arg.      | 0.71          |
| 11 | Huku            | <i>Dombeya rotundifolia</i> Hochst                | 0.18          |
| 12 | -               | <i>Ehretia amoena</i>                             | 0.11          |
| 13 | Ombangalunda    | <i>Erythrina abyssinica</i> Lam. ex DC.           | 0.11          |
| 14 | Ongungu         | <i>Erythrophleum africanum</i> Benth. Harms       | 4.50          |
| 15 | -               | <i>Euclea natalensis</i>                          | 0.32          |
| 16 | Otchilavi       | <i>Gardenia volkensii</i> K.Schum.                | 0.59          |
| 17 | Ometi           | <i>Hymenocardia acida</i> Tul                     | 3.36          |
| 18 | Mone            | <i>Isobertia angolensis</i> Hoyle e Brenan        | 5.88          |
| 19 | Olumue          | <i>Jubernardia paniculata</i> (Benth.) Troupin    | 8.44          |
| 20 | Ovassongombe    | <i>Kraussia floribunda</i>                        | 0.20          |
| 21 | Ossui           | <i>Monotes</i> spp                                | 8.42          |
| 22 | Omia            | <i>Ocha schweinfurthiana</i> F. Hoffm.            | 3.31          |
| 23 | Ondjassonde     | -                                                 | 0.04          |
| 24 | Uchia           | <i>Parinari curatellifolia</i> Planch. Ex Benth.  | 2.03          |
| 25 | Omako           | <i>Pericopsis angolensis</i> (Barker) van Meeuwen | 1.80          |
| 26 | Tchikuniambambi | <i>Pseudolachnostylis maprouneifolia</i> Pax      | 0.77          |
| 27 | Girassonde      | <i>Pterocarpus angolensis</i> DC                  | 1.60          |
| 28 | -               | <i>Randia Kuhniana</i> F. Hoffm. Schum.           | 0.04          |
| 29 | Upu             | <i>Rothmannia engleriana</i> (K. Schum.) Keay     | 0.69          |
| 30 | Onenge          | <i>Sterculia quinqueloba</i> (Garcke) K. Schum    | 0.14          |
| 31 | Maboque         | <i>Strychnos cocculoides</i> Baker                | 0.05          |
| 32 | Oganja          | <i>Swartzia madagascariensis</i> (Taub.) Desv.    | 0.04          |
| 33 | Akulakula       | <i>Syzygium guineense</i> (Willd.) DC             | 4.84          |
| 34 | Mueia           | <i>Terminalia brachystemma</i> Weiw. Ex Hiern     | 2.01          |

| N. | Local name      | Scientific name                    | Frequency (%) |
|----|-----------------|------------------------------------|---------------|
| 35 | Tchikuliambambi | -                                  | 0.73          |
| 36 | Katetembula     | <i>Uapaca benguellensis</i> Muell. | 1.09          |
| 37 | -               | <i>Uapaca gosswoileri</i> hutch    | 1.71          |
| 38 | Lombula         | <i>Uapaca kirkiana</i> Mull. Arg   | 0.04          |
| 39 | Upandandjamba   | -                                  | 0.62          |
| 40 | -               | N.I.                               | 0.02          |

**Table S2.** Density, diameter at breast height (DBH), height, above-ground biomass (AGB), below-ground biomass (BGB), total biomass, volume, above-ground accumulated Carbon (AGC), below-ground accumulate Carbon (BGC), total accumulate Carbon (TC), above-ground CO<sub>2</sub>eq (AGCO<sub>2</sub>eq), below-ground CO<sub>2</sub>eq (BGCO<sub>2</sub>eq) and total CO<sub>2</sub>eq (TCO<sub>2</sub>eq) by plot.

| Municipality | Plot | X      | Y       | Density   | DBH   | Height | AGB    | BGB    | TB     | Volume | AGC    | BGC   | TC     | AG CO <sub>2</sub> eq | BG CO <sub>2</sub> eq | Total CO <sub>2</sub> eq |
|--------------|------|--------|---------|-----------|-------|--------|--------|--------|--------|--------|--------|-------|--------|-----------------------|-----------------------|--------------------------|
| Bailundo     | 1    | 580972 | 8686332 | 2.832.95  | 7.81  | 4.03   | 122.41 | 52.15  | 174.56 | 67.76  | 57.53  | 24.51 | 82.04  | 210,95                | 89,87                 | 300,83                   |
| Bailundo     | 4    | 577419 | 8729255 | 3.756.05  | 5.22  | 3.58   | 54.48  | 26.84  | 81.32  | 43.49  | 25.60  | 12.61 | 38.22  | 93,88                 | 46,25                 | 140,14                   |
| Bailundo     | 5    | 556386 | 8671564 | 3.055.77  | 7.64  | 3.73   | 116.57 | 50.13  | 166.70 | 75.60  | 54.79  | 23.56 | 78.35  | 200,89                | 86,39                 | 287,28                   |
| Bailundo     | 6    | 575494 | 8691964 | 2.323.66  | 12.38 | 6.89   | 398.68 | 133.14 | 531.82 | 127.95 | 187.38 | 62.57 | 249.95 | 687,06                | 229,44                | 916,50                   |
| Bailundo     | 8    | 637600 | 8647390 | 1.909.85  | 7.14  | 3.72   | 79.45  | 37.72  | 117.16 | 49.72  | 37.34  | 17.73 | 55.07  | 136,91                | 65,00                 | 201,91                   |
| Bailundo     | 9    | 617805 | 8664136 | 2.832.95  | 8.54  | 5.06   | 165.85 | 65.90  | 231.75 | 93.78  | 77.95  | 30.97 | 108.92 | 285,81                | 113,57                | 399,37                   |
| Bailundo     | 13   | 618206 | 8659924 | 3.310.42  | 6.19  | 3.80   | 76.89  | 35.60  | 112.49 | 76.68  | 36.14  | 16.73 | 52.87  | 132,50                | 61,35                 | 193,86                   |
| Bailundo     | 18   | 570482 | 8702318 | 2.610.13  | 9.01  | 5.35   | 185.32 | 72.15  | 257.47 | 86.19  | 87.10  | 33.91 | 121.01 | 319,37                | 124,34                | 443,71                   |
| Bailundo     | 20   | 581334 | 8685843 | 3.310.42  | 6.67  | 3.46   | 86.12  | 39.25  | 125.37 | 57.04  | 40.48  | 18.45 | 58.92  | 148,41                | 67,64                 | 216,05                   |
| Bailundo     | 21   | 578720 | 8724741 | 3.565.06  | 6.08  | 3.63   | 74.95  | 34.82  | 109.77 | 81.46  | 35.23  | 16.37 | 51.59  | 129,16                | 60,01                 | 189,17                   |
| Bailundo     | 25   | 619867 | 8657133 | 3.692.39  | 8.14  | 5.30   | 174.49 | 67.46  | 241.95 | 98.83  | 82.01  | 31.71 | 113.72 | 300,70                | 116,26                | 416,96                   |
| Bailundo     | 27   | 589765 | 8689544 | 4.265.34  | 4.65  | 2.84   | 40.22  | 21.12  | 61.34  | 42.00  | 18.90  | 9.92  | 28.83  | 69,32                 | 36,39                 | 105,71                   |
| Bailundo     | 34   | 586132 | 8725486 | 2.610.13  | 4.62  | 2.57   | 29.54  | 16.99  | 46.53  | 26.60  | 13.89  | 7.99  | 21.87  | 50,91                 | 29,28                 | 80,19                    |
| Bailundo     | 41   | 544217 | 8688819 | 2.578.30  | 14.83 | 9.08   | 716.41 | 209.55 | 925.97 | 181.21 | 336.71 | 98.49 | 435.20 | 1.234,6               | 361,13                | 1.595,75                 |
| Bailundo     | 45   | 618911 | 8651684 | 5.697.73  | 5.31  | 4.12   | 74.60  | 33.58  | 108.18 | 66.67  | 35.06  | 15.78 | 50.84  | 128,56                | 57,86                 | 186,42                   |
| Bailundo     | 47   | 592084 | 8693161 | 3.087.60  | 7.41  | 4.79   | 123.76 | 51.87  | 175.63 | 75.69  | 58.17  | 24.38 | 82.55  | 213,27                | 89,40                 | 302,67                   |
| Bailundo     | 49   | 562011 | 8726247 | 3.405.91  | 8.18  | 5.55   | 173.77 | 67.37  | 241.13 | 93.81  | 81.67  | 31.66 | 113.33 | 299,46                | 116,09                | 415,56                   |
| Caala        | 11   | 555046 | 8520620 | 4.615.48  | 7.41  | 5.62   | 162.90 | 62.84  | 225.74 | 95.45  | 76.56  | 29.53 | 106.10 | 280,73                | 108,29                | 389,02                   |
| Caala        | 16   | 553961 | 8515540 | 3.023.94  | 7.28  | 4.64   | 116.12 | 49.41  | 165.53 | 69.45  | 54.58  | 23.22 | 77.80  | 200,11                | 85,15                 | 285,26                   |
| Caala        | 19   | 540942 | 8515014 | 5.538.58  | 5.84  | 4.42   | 93.70  | 40.29  | 133.99 | 78.29  | 44.04  | 18.94 | 62.97  | 161,47                | 69,43                 | 230,91                   |
| Caala        | 26   | 561875 | 8525037 | 2.801.12  | 9.33  | 5.46   | 209.22 | 79.20  | 288.42 | 186.16 | 98.34  | 37.22 | 135.56 | 360,56                | 136,49                | 497,05                   |
| Caala        | 28   | 558095 | 8510034 | 2.323.66  | 8.52  | 5.98   | 163.37 | 65.17  | 228.54 | 75.37  | 76.78  | 30.63 | 107.41 | 281,53                | 112,31                | 393,84                   |
| Caala        | 35   | 546585 | 8575450 | 2.546.47  | 5.10  | 3.39   | 41.58  | 22.10  | 63.68  | 36.56  | 19.54  | 10.39 | 29.93  | 71,66                 | 38,08                 | 109,74                   |
| Caala        | 44   | 551471 | 8519093 | 12.382.23 | 4.78  | 4.97   | 95.07  | 38.77  | 133.84 | 105.43 | 44.68  | 18.22 | 62.90  | 163,84                | 66,81                 | 230,65                   |
| Ekunha       | 10   | 551952 | 8627314 | 4.329.00  | 7.66  | 6.26   | 179.39 | 67.77  | 247.17 | 92.07  | 84.31  | 31.85 | 116.17 | 309,15                | 116,80                | 425,95                   |

| Municipality      | Plot | X      | Y       | Density         | DBH         | Height      | AGB           | BGB          | TB            | Volume       | AGC          | BGC          | TC           | AG CO <sub>2</sub> eq | BG CO <sub>2</sub> eq | Total CO <sub>2</sub> eq |
|-------------------|------|--------|---------|-----------------|-------------|-------------|---------------|--------------|---------------|--------------|--------------|--------------|--------------|-----------------------|-----------------------|--------------------------|
| Ekunha            | 24   | 562145 | 8624608 | 3.565.06        | 7.18        | 4.86        | 125.01        | 51.85        | 176.86        | 53.66        | 58.75        | 24.37        | 83.12        | 215,43                | 89,35                 | 304,78                   |
| Kacchiungo        | 14   | 659270 | 8544464 | 4.138.02        | 5.94        | 4.85        | 88.51         | 38.89        | 127.41        | 80.08        | 41.60        | 18.28        | 59.88        | 152,54                | 67,02                 | 219,56                   |
| Kacchiungo        | 15   | 659451 | 8544115 | 3.278.58        | 7.36        | 5.28        | 131.94        | 54.16        | 186.10        | 78.67        | 62.01        | 25.46        | 87.47        | 227,38                | 93,34                 | 320,72                   |
| Kacchiungo        | 23   | 659394 | 8542502 | 2.578.30        | 8.88        | 4.89        | 170.58        | 67.85        | 238.43        | 90.44        | 80.17        | 31.89        | 112.06       | 293,97                | 116,92                | 410,89                   |
| Kacchiungo        | 33   | 662089 | 8525753 | 4.233.51        | 6.23        | 4.76        | 114.80        | 47.17        | 161.97        | 86.28        | 53.96        | 22.17        | 76.13        | 197,84                | 81,28                 | 279,13                   |
| Londuimbale       | 7    | 519406 | 8631739 | 3.469.57        | 6.50        | 4.25        | 92.15         | 40.89        | 133.04        | 56.87        | 43.31        | 19.22        | 62.53        | 158,81                | 70,46                 | 229,27                   |
| Londuimbale       | 30   | 539124 | 8637551 | 3.151.26        | 7.88        | 4.76        | 141.84        | 57.91        | 199.75        | 77.53        | 66.66        | 27.22        | 93.88        | 244,43                | 99,81                 | 344,24                   |
| Londuimbale       | 48   | 521055 | 8664385 | 3.565.06        | 7.58        | 5.62        | 150.98        | 59.93        | 210.91        | 78.24        | 70.96        | 28.17        | 99.13        | 260,19                | 103,28                | 363,47                   |
| Longonjo          | 2    | 517985 | 8552202 | 4.169.85        | 7.31        | 4.90        | 140.60        | 56.51        | 197.11        | 89.77        | 66.08        | 26.56        | 92.64        | 242,30                | 97,39                 | 339,69                   |
| Longonjo          | 37   | 509474 | 8522687 | 3.278.58        | 6.15        | 4.43        | 81.31         | 36.96        | 118.26        | 64.70        | 38.21        | 17.37        | 55.58        | 140,12                | 63,69                 | 203,81                   |
| Tchicala          | 3    | 610760 | 8598428 | 2.673.80        | 4.25        | 2.53        | 24.68         | 14.68        | 39.37         | 22.05        | 11.60        | 6.90         | 18.50        | 42,54                 | 25,30                 | 67,84                    |
| Tchicala          | 32   | 590020 | 8614605 | 4.265.34        | 6.53        | 4.72        | 109.04        | 46.04        | 155.08        | 72.28        | 51.25        | 21.64        | 72.89        | 187,92                | 79,34                 | 267,25                   |
| Tchicala          | 40   | 597200 | 8625776 | 6.779.98        | 4.90        | 3.57        | 63.09         | 29.28        | 92.37         | 64.97        | 29.65        | 13.76        | 43.42        | 108,73                | 50,46                 | 159,19                   |
| Tchicala          | 42   | 594724 | 8621825 | 3.533.23        | 6.94        | 4.95        | 116.38        | 48.91        | 165.29        | 66.48        | 54.70        | 22.99        | 77.69        | 200,57                | 84,29                 | 284,86                   |
| Tchingenje        | 12   | 484926 | 8579167 | 3.183.09        | 5.47        | 3.86        | 57.94         | 28.35        | 86.30         | 48.93        | 27.23        | 13.33        | 40.56        | 99,86                 | 48,86                 | 148,72                   |
| Tchingenje        | 17   | 498606 | 8580707 | 3.628.72        | 7.83        | 6.23        | 171.97        | 66.15        | 238.12        | 92.95        | 80.83        | 31.09        | 111.92       | 296,37                | 114,00                | 410,37                   |
| Tchingenje        | 22   | 483221 | 8579840 | 4.201.68        | 7.11        | 5.20        | 137.06        | 55.15        | 192.21        | 93.60        | 64.42        | 25.92        | 90.34        | 236,19                | 95,04                 | 331,23                   |
| Tchingenje        | 29   | 486387 | 8590004 | 2.546.47        | 10.13       | 7.45        | 278.69        | 98.72        | 377.41        | 103.50       | 130.98       | 46.40        | 177.38       | 480,27                | 170,12                | 650,40                   |
| Tchingenje        | 31   | 497386 | 8580914 | 2.323.66        | 8.64        | 6.36        | 173.70        | 68.26        | 241.96        | 64.24        | 81.64        | 32.08        | 113.72       | 299,35                | 117,63                | 416,98                   |
| Tchingenje        | 36   | 495394 | 8581242 | 2.450.98        | 5.54        | 4.20        | 54.19         | 27.14        | 81.33         | 33.99        | 25.47        | 12.75        | 38.22        | 93,39                 | 46,77                 | 140,15                   |
| Tchingenje        | 38   | 486719 | 8589164 | 4.329.00        | 4.79        | 3.50        | 48.45         | 24.25        | 72.70         | 57.13        | 22.77        | 11.40        | 34.17        | 83,49                 | 41,78                 | 125,28                   |
| Ukuma             | 39   | 521443 | 8602891 | 3.246.75        | 8.53        | 6.81        | 205.74        | 76.58        | 282.32        | 93.39        | 96.70        | 35.99        | 132.69       | 354,56                | 131,96                | 486,52                   |
| Ukuma             | 43   | 519504 | 8595770 | 2.482.81        | 9.26        | 6.55        | 212.09        | 79.81        | 291.90        | 88.30        | 99.68        | 37.51        | 137.19       | 365,50                | 137,54                | 503,04                   |
| Ukuma             | 46   | 514534 | 8592359 | 3.724.22        | 8.50        | 6.65        | 216.13        | 79.19        | 295.33        | 108.45       | 101.58       | 37.22        | 138.80       | 372,47                | 136,48                | 508,95                   |
| <b>Mean</b>       |      |        |         | <b>3.616,38</b> | <b>7.25</b> | <b>4.89</b> | <b>140.04</b> | <b>55.02</b> | <b>195.05</b> | <b>78.57</b> | <b>65.82</b> | <b>25.86</b> | <b>91.67</b> | <b>241,33</b>         | <b>94,81</b>          | <b>336,14</b>            |
| <b>Std. Desv.</b> |      |        |         | <b>1.586,87</b> | <b>1.97</b> | <b>1.30</b> | <b>108.59</b> | <b>31.69</b> | <b>140.14</b> | <b>31.07</b> | <b>51.04</b> | <b>14.89</b> | <b>65.87</b> | <b>187,14</b>         | <b>54,61</b>          | <b>241,51</b>            |

Density expressed in trees ha<sup>-1</sup>; diameter at breast height (dbh) expressed in cm; height expressed in m; above-ground biomass (AGB) expressed in [Mg/ha<sup>-1</sup>]; below-ground biomass (BGB) expressed in [Mg/ha<sup>-1</sup>]; Total biomass expressed in [Mg/ha<sup>-1</sup>]; Volume expressed in m<sup>3</sup> ha<sup>-1</sup>; above-ground accumulated Carbon (AGC) expressed in [Mg/ha<sup>-1</sup>]; below-ground accumulate Carbon (BGC) expressed in [Mg/ha<sup>-1</sup>]; total accumulate Carbon (TC) expressed in [Mg/ha<sup>-1</sup>]; above-ground CO<sub>2</sub>eq (AGCO<sub>2</sub>eq) expressed in [Mg/ha<sup>-1</sup>]; below-ground CO<sub>2</sub>eq (BGCO<sub>2</sub>eq) expressed in [Mg/ha<sup>-1</sup>] and total CO<sub>2</sub>eq (TCO<sub>2</sub>eq) expressed in [Mg/ha<sup>-1</sup>].

**Table S3.** Above-ground biomass (AGB), below-ground biomass (BGB), total Biomass (TB), volume, above-ground accumulated Carbon (AGC), below-ground accumulated Carbon (BGC), total accumulated Carbon (TC), above-ground CO<sub>2</sub>eq, below-ground CO<sub>2</sub>eq and total CO<sub>2</sub>eq by municipality.

| Municipality | <sup>1</sup> AGB | <sup>2</sup> BGB | <sup>3</sup> TB | <sup>4</sup> Volume | <sup>5</sup> AGC | <sup>6</sup> BGC | <sup>7</sup> TC | <sup>8</sup> AG CO <sub>2</sub> eq | <sup>9</sup> BG CO <sub>2</sub> eq | <sup>10</sup> Total CO <sub>2</sub> eq |
|--------------|------------------|------------------|-----------------|---------------------|------------------|------------------|-----------------|------------------------------------|------------------------------------|----------------------------------------|
| Bailundo     | 158.44±167.35    | 59.74±47.13      | 218.18±214.35   | 79.09±36.01         | 74.47±78.65      | 28.08±22.15      | 102.55±100.75   | 273.05±288.40                      | 102.96±81.23                       | 376.00±369.40                          |
| Caála        | 125.99±56.14     | 51.11±19.31      | 177.10±75.42    | 92.39±46.73         | 59.22±26.38      | 24.02±9.08       | 83.24±35.45     | 217.13±96.74                       | 88.08±33.29                        | 305.21±129.98                          |
| Ekunha       | 152.20±38.45     | 59.81±11.26      | 212.01±49.72    | 72.86±27.16         | 71.53±18.07      | 28.11±5.29       | 99.65±23.37     | 262.29±66.27                       | 103.07±19.41                       | 365.37±85.68                           |
| Katchiungo   | 126.46±34.41     | 52.02±12.26      | 178.48±46.66    | 83.87±±5.49         | 59.44±16.17      | 24.45±5.76       | 83.88±21.93     | 217.93±59.30                       | 89.64±21.13                        | 307.58±80.42                           |
| Londuimbale  | 128.32±31.66     | 52.91±10.46      | 181.23±42.11    | 70.88±12.14         | 60.31±14.88      | 24.87±4.92       | 85.18±19.79     | 221.14±54.55                       | 91.18±18.03                        | 312.32±72.57                           |
| Longonjo     | 110.95±41.93     | 46.74±13.83      | 157.69±55.75    | 77.24±17.73         | 52.15±19.71      | 21.97±6.50       | 74.11±26.20     | 191.21±72.26                       | 80.54±23.83                        | 271.75±96.08                           |
| Tchicala     | 78.30±42.82      | 34.73±15.92      | 113.03±58.74    | 56.44±23.15         | 36.80±20.13      | 16.32±7.48       | 53.12±27.61     | 134.94±73.80                       | 59.85±27.44                        | 194.79±101.23                          |
| Tchingenje   | 131.72±85.05     | 52.57±27.70      | 184.29±112.72   | 70.62±26.28         | 61.91±39.97      | 24.71±13.02      | 86.62±52.98     | 226.99±146.57                      | 90.60±47.73                        | 317.59±194.26                          |
| Ukuma        | 211.32±5.24      | 78.53±1.72       | 289.85±6.74     | 96.71±10.48         | 99.32±2.46       | 36.91±0.81       | 136.23±3.17     | 364.18±9.03                        | 135.33±2.96                        | 499.51±11.62                           |

<sup>1</sup>Above-ground biomass (AGB) expressed in [Mg/ha<sup>-1</sup>]; <sup>2</sup>below-ground biomass (BGB) expressed in [Mg/ha<sup>-1</sup>]; <sup>3</sup>Total biomass expressed in [Mg/ha<sup>-1</sup>]; <sup>4</sup>Volume expressed in m<sup>3</sup> ha<sup>-1</sup>; <sup>5</sup>above-ground accumulated Carbon (AGC) expressed in [Mg/ha<sup>-1</sup>]; <sup>6</sup>below-ground accumulate Carbon (BGC) expressed in [Mg/ha<sup>-1</sup>]; <sup>7</sup>total accumulate Carbon (TC) expressed in [Mg/ha<sup>-1</sup>]; <sup>8</sup>above-ground CO<sub>2</sub>eq (AGCO<sub>2</sub>eq) expressed in [Mg/ha<sup>-1</sup>]; <sup>9</sup>below-ground CO<sub>2</sub>eq (BGCO<sub>2</sub>eq) expressed in [Mg/ha<sup>-1</sup>] and <sup>10</sup>total CO<sub>2</sub>eq (TCO<sub>2</sub>eq) expressed in [Mg/ha<sup>-1</sup>]. For each variable, the mean value and standard deviation by municipality are included.

**Table S4.** Potential Charcoal Productivity (PCP) and Allowable Cutting Value (ACV) by plot.

| Municipality | Plot | <sup>1</sup> PCP | <sup>2</sup> ACV |
|--------------|------|------------------|------------------|
| Bailundo     | 1    | 13.246,88        | 18               |
| Bailundo     | 4    | 8.501,84         | 24               |
| Bailundo     | 5    | 14.780,28        | 22               |
| Bailundo     | 6    | 25.014,29        | 23               |
| Bailundo     | 8    | 9.720,16         | 13               |
| Bailundo     | 9    | 18.334,16        | 21               |
| Bailundo     | 13   | 14.991,55        | 23               |
| Bailundo     | 18   | 16.849,86        | 20               |
| Bailundo     | 20   | 11.151,19        | 21               |
| Bailundo     | 21   | 15.924,55        | 25               |
| Bailundo     | 25   | 19.320,89        | 26               |
| Bailundo     | 27   | 8.211,58         | 27               |
| Bailundo     | 34   | 5.200,63         | 16               |
| Bailundo     | 41   | 35.426,97        | 30               |
| Bailundo     | 45   | 13.034,92        | 37               |
| Bailundo     | 47   | 14.797,83        | 22               |
| Bailundo     | 49   | 18.339,94        | 24               |
| Caala        | 11   | 18.659,73        | 31               |
| Caala        | 16   | 13.577,17        | 21               |
| Caala        | 19   | 15.305,08        | 36               |
| Caala        | 26   | 36.394,42        | 21               |
| Caala        | 28   | 14.734,34        | 17               |
| Caala        | 35   | 7.146,83         | 17               |
| Caala        | 44   | 20.612,34        | 78               |
| Ekunha       | 10   | 18.000,14        | 28               |
| Ekunha       | 24   | 10.489,98        | 23               |
| Kacchiungo   | 14   | 15.655,07        | 30               |
| Kacchiungo   | 15   | 15.380,01        | 23               |
| Kacchiungo   | 23   | 17.681,33        | 19               |
| Kacchiungo   | 33   | 16.866,95        | 27               |
| Londumbale   | 7    | 11.118,04        | 22               |
| Londumbale   | 30   | 15.157,90        | 21               |
| Londumbale   | 48   | 15.296,64        | 23               |
| Longonjo     | 2    | 17.550,77        | 28               |
| Longonjo     | 37   | 12.649,31        | 22               |
| Tchicala     | 3    | 4.310,39         | 17               |
| Tchicala     | 32   | 14.131,40        | 27               |
| Tchicala     | 40   | 12.701,72        | 43               |
| Tchicala     | 42   | 12.995,98        | 23               |
| Tchingenje   | 12   | 9.566,77         | 22               |
| Tchingenje   | 17   | 18.172,50        | 25               |

| Municipality | Plot | <sup>1</sup> PCP | <sup>2</sup> ACV |
|--------------|------|------------------|------------------|
| Tchingenje   | 22   | 18.299,51        | 30               |
| Tchingenje   | 29   | 20.233,53        | 20               |
| Tchingenje   | 31   | 12.558,03        | 16               |
| Tchingenje   | 36   | 6.645,72         | 15               |
| Tchingenje   | 38   | 11.168,65        | 29               |
| Ukuma        | 39   | 18.257,42        | 23               |
| Ukuma        | 43   | 17.263,27        | 18               |
| Ukuma        | 46   | 21.202,10        | 27               |

<sup>1</sup>Mean values of PCP expressed in Kg ha<sup>-1</sup>.

<sup>2</sup>Mean values of ACV expressed in number of trees ha<sup>-1</sup>

**Table S5.** Annual Cutting Value (ACV), Annual Allowable Cut Volume (AACV) and Potential Annual Allowable Charcoal Productivity (PAACP) for the rotation lengths considered (55, 40, 25 and 15 years).

| Municipality | Plot | Hypotheses | <sup>1</sup> ACV | <sup>2</sup> AACV | <sup>3</sup> PAACP |
|--------------|------|------------|------------------|-------------------|--------------------|
| Bailundo     | 1    | 55         | 10.48            | 10.77             | 2,104.60           |
|              |      | 40         | 14.40            | 12.16             | 2,378.11           |
|              |      | 25         | 23.05            | 18.22             | 3,562.66           |
|              |      | 15         | 38.41            | 28.28             | 5,527.95           |
| Longonjo     | 2    | 55         | 16.20            | 11.99             | 2,344.90           |
|              |      | 40         | 22.28            | 15.77             | 3,083.64           |
|              |      | 25         | 35.65            | 23.63             | 4,619.63           |
|              |      | 15         | 59.42            | 36.66             | 7,167.99           |
| Tchicala     | 3    | 55         | 9.72             | 3.04              | 594.39             |
|              |      | 40         | 13.37            | 4.00              | 781.64             |
|              |      | 25         | 21.39            | 5.99              | 1,170.99           |
|              |      | 15         | 35.65            | 9.29              | 1,816.95           |
| Bailundo     | 4    | 55         | 13.66            | 5.80              | 1,134.39           |
|              |      | 40         | 18.78            | 7.63              | 1,491.77           |
|              |      | 25         | 30.05            | 11.43             | 2,234.84           |
|              |      | 15         | 50.08            | 17.74             | 3,467.66           |
| Bailundo     | 5    | 55         | 12.50            | 10.37             | 2,026.82           |
|              |      | 40         | 17.19            | 13.63             | 2,665.36           |
|              |      | 25         | 27.50            | 20.42             | 3,993.00           |
|              |      | 15         | 45.84            | 31.69             | 6,195.68           |
| Bailundo     | 6    | 55         | 13.48            | 25.36             | 4,958.03           |
|              |      | 40         | 18.54            | 33.35             | 6,520.03           |
|              |      | 25         | 29.67            | 49.96             | 9,767.71           |
|              |      | 15         | 49.44            | 77.52             | 15,155.93          |
| Londumbale   | 7    | 55         | 12.62            | 7.91              | 1,547.00           |
|              |      | 40         | 17.35            | 10.41             | 2,034.38           |
|              |      | 25         | 27.76            | 15.59             | 3,047.72           |
|              |      | 15         | 46.26            | 24.19             | 4,728.95           |
| Bailundo     | 8    | 55         | 7.47             | 5.92              | 1,156.70           |
|              |      | 40         | 10.27            | 7.78              | 1,521.11           |
|              |      | 25         | 16.42            | 11.66             | 2,278.79           |
|              |      | 15         | 27.37            | 18.09             | 3,535.86           |
| Bailundo     | 9    | 55         | 12.39            | 12.46             | 2,436.12           |
|              |      | 40         | 17.03            | 16.39             | 3,203.61           |
|              |      | 25         | 27.25            | 24.55             | 4,799.36           |
|              |      | 15         | 45.41            | 38.09             | 7,446.85           |
| Ekunha       | 10   | 55         | 16.26            | 13.05             | 2,551.64           |
|              |      | 40         | 22.36            | 17.16             | 3,355.52           |
|              |      | 25         | 35.78            | 25.71             | 5,026.94           |



| Municipality | Plot | Hypotheses | <sup>1</sup> ACV | <sup>2</sup> AACV | <sup>3</sup> PAACP |
|--------------|------|------------|------------------|-------------------|--------------------|
|              |      | 15         | 59.63            | 39.90             | 7,799.98           |
| Caala        | 11   | 55         | 17.83            | 13.33             | 2,605.50           |
|              |      | 40         | 24.51            | 17.53             | 3,426.35           |
|              |      | 25         | 39.22            | 26.26             | 5,133.04           |
|              |      | 15         | 65.36            | 40.74             | 7,964.61           |
|              |      |            |                  |                   |                    |
| Tchingenje   | 12   | 55         | 12.44            | 5.82              | 1,136.96           |
|              |      | 40         | 17.11            | 7.65              | 1,495.16           |
|              |      | 25         | 27.37            | 11.46             | 2,239.91           |
|              |      | 15         | 45.62            | 17.78             | 3,475.52           |
| Bailundo     | 13   | 55         | 13.08            | 7.50              | 1,466.47           |
|              |      | 40         | 17.98            | 9.86              | 1,928.47           |
|              |      | 25         | 28.78            | 14.78             | 2,889.06           |
|              |      | 15         | 47.96            | 22.93             | 4,482.78           |
| Kacchiungo   | 14   | 55         | 17.25            | 8.88              | 1,735.48           |
|              |      | 40         | 23.71            | 11.67             | 2,282.24           |
|              |      | 25         | 37.94            | 17.49             | 3,419.04           |
|              |      | 15         | 63.24            | 27.14             | 5,305.11           |
| Kacchiungo   | 15   | 55         | 13.31            | 10.27             | 2,007.39           |
|              |      | 40         | 18.30            | 13.50             | 2,639.80           |
|              |      | 25         | 29.28            | 20.23             | 3,954.71           |
|              |      | 15         | 48.81            | 31.39             | 6,136.28           |
| Caala        | 16   | 55         | 12.15            | 9.32              | 1,821.83           |
|              |      | 40         | 16.71            | 12.25             | 2,395.79           |
|              |      | 25         | 26.74            | 18.36             | 3,589.15           |
|              |      | 15         | 44.56            | 28.49             | 5,569.06           |
| Tchingenje   | 17   | 55         | 14.58            | 12.33             | 2,410.69           |
|              |      | 40         | 20.05            | 16.22             | 3,170.16           |
|              |      | 25         | 32.09            | 24.29             | 4,749.25           |
|              |      | 15         | 53.48            | 37.69             | 7,369.11           |
| Bailundo     | 18   | 55         | 11.40            | 12.73             | 2,488.02           |
|              |      | 40         | 15.68            | 16.74             | 3,271.85           |
|              |      | 25         | 25.08            | 25.07             | 4,901.59           |
|              |      | 15         | 41.80            | 38.90             | 7,605.49           |
| Caala        | 19   | 55         | 20.66            | 10.05             | 1,964.58           |
|              |      | 40         | 28.41            | 13.21             | 2,583.51           |
|              |      | 25         | 45.45            | 19.80             | 3,870.38           |
|              |      | 15         | 75.76            | 30.72             | 6,005.42           |
| Bailundo     | 20   | 55         | 12.04            | 7.95              | 1,553.32           |
|              |      | 40         | 16.55            | 10.45             | 2,042.69           |
|              |      | 25         | 26.48            | 15.65             | 3,060.17           |
|              |      | 15         | 44.14            | 24.29             | 4,748.27           |

| Municipality | Plot | Hypotheses | <sup>1</sup> ACV | <sup>2</sup> AACV | <sup>3</sup> PAACP |
|--------------|------|------------|------------------|-------------------|--------------------|
| Bailundo     | 21   | 55         | 14.35            | 7.88              | 1,541.37           |
|              |      | 40         | 19.74            | 10.37             | 2,026.97           |
|              |      | 25         | 31.58            | 15.53             | 3,036.63           |
|              |      | 15         | 52.63            | 24.10             | 4,711.74           |
| Tchingenje   | 22   | 55         | 17.19            | 12.05             | 2,356.08           |
|              |      | 40         | 23.63            | 15.85             | 3,098.35           |
|              |      | 25         | 37.82            | 23.74             | 4,641.67           |
|              |      | 15         | 63.03            | 36.84             | 7,202.18           |
| Kacthiungo   | 23   | 55         | 10.94            | 11.97             | 2,339.65           |
|              |      | 40         | 15.04            | 15.74             | 3,076.74           |
|              |      | 25         | 24.06            | 23.58             | 4,609.29           |
|              |      | 15         | 40.11            | 36.58             | 7,151.94           |
| Ekunha       | 24   | 55         | 13.48            | 9.95              | 1,945.64           |
|              |      | 40         | 18.54            | 13.09             | 2,558.61           |
|              |      | 25         | 29.67            | 19.61             | 3,833.07           |
|              |      | 15         | 49.44            | 30.42             | 5,947.53           |
| Bailundo     | 25   | 55         | 15.16            | 13.63             | 2,665.43           |
|              |      | 40         | 20.85            | 17.93             | 3,505.15           |
|              |      | 25         | 33.36            | 26.86             | 5,251.10           |
|              |      | 15         | 55.60            | 41.68             | 8,147.80           |
| Caala        | 26   | 55         | 12.04            | 14.15             | 2,766.80           |
|              |      | 40         | 16.55            | 18.61             | 3,638.47           |
|              |      | 25         | 26.48            | 27.88             | 5,450.82           |
|              |      | 15         | 44.14            | 43.26             | 8,457.69           |
| Bailundo     | 27   | 55         | 15.68            | 5.37              | 1,049.43           |
|              |      | 40         | 21.57            | 7.06              | 1,380.05           |
|              |      | 25         | 34.50            | 10.58             | 2,067.46           |
|              |      | 15         | 57.51            | 16.41             | 3,207.95           |
| Caala        | 28   | 55         | 9.67             | 10.03             | 1,960.12           |
|              |      | 40         | 13.29            | 13.18             | 2,577.64           |
|              |      | 25         | 21.26            | 19.75             | 3,861.59           |
|              |      | 15         | 35.44            | 30.65             | 5,991.78           |
| Tchingenje   | 29   | 55         | 11.34            | 15.49             | 3,027.54           |
|              |      | 40         | 15.60            | 20.36             | 3,981.35           |
|              |      | 25         | 24.96            | 30.51             | 5,964.50           |
|              |      | 15         | 41.59            | 47.34             | 9,254.73           |
| Londuimbale  | 30   | 55         | 12.33            | 10.79             | 2,109.27           |
|              |      | 40         | 16.95            | 14.19             | 2,773.78           |
|              |      | 25         | 27.12            | 21.26             | 4,155.42           |
|              |      | 15         | 45.20            | 32.98             | 6,447.70           |
| Tchingenje   | 31   | 55         | 9.14             | 9.79              | 1,914.10           |

| Municipality | Plot | Hypotheses | <sup>1</sup> ACV | <sup>2</sup> AACV | <sup>3</sup> PAACP |
|--------------|------|------------|------------------|-------------------|--------------------|
|              |      | 40         | 12.57            | 12.88             | 2,517.12           |
|              |      | 25         | 20.12            | 19.29             | 3,770.92           |
|              |      | 15         | 33.53            | 29.93             | 5,851.10           |
| Tchicala     | 32   | 55         | 15.68            | 9.61              | 1,879.70           |
|              |      | 40         | 21.57            | 12.64             | 2,471.89           |
|              |      | 25         | 34.50            | 18.94             | 3,703.16           |
|              |      | 15         | 57.51            | 29.39             | 5,745.96           |
| Kacthiungo   | 33   | 55         | 15.57            | 8.80              | 1,720.38           |
|              |      | 40         | 21.41            | 11.57             | 2,262.38           |
|              |      | 25         | 34.25            | 17.34             | 3,389.29           |
|              |      | 15         | 57.08            | 26.90             | 5,258.94           |
| Bailundo     | 34   | 55         | 9.49             | 3.44              | 672.32             |
|              |      | 40         | 13.05            | 4.52              | 884.14             |
|              |      | 25         | 20.88            | 6.78              | 1,324.53           |
|              |      | 15         | 34.80            | 10.51             | 2,055.19           |
| Caala        | 35   | 55         | 9.95             | 4.24              | 829.74             |
|              |      | 40         | 13.69            | 5.58              | 1,091.15           |
|              |      | 25         | 21.90            | 8.36              | 1,634.66           |
|              |      | 15         | 36.50            | 12.97             | 2,536.40           |
| Tchingenje   | 36   | 55         | 8.91             | 4.46              | 871.10             |
|              |      | 40         | 12.25            | 5.86              | 1,145.53           |
|              |      | 25         | 19.61            | 8.78              | 1,716.13           |
|              |      | 15         | 32.68            | 13.62             | 2,662.81           |
| Longonjo     | 37   | 55         | 12.44            | 7.11              | 1,389.33           |
|              |      | 40         | 17.11            | 9.35              | 1,827.03           |
|              |      | 25         | 27.37            | 14.00             | 2,737.09           |
|              |      | 15         | 45.62            | 21.72             | 4,246.97           |
| Tchingenje   | 38   | 55         | 16.73            | 6.01              | 1,175.31           |
|              |      | 40         | 23.00            | 7.91              | 1,545.58           |
|              |      | 25         | 36.80            | 11.84             | 2,315.45           |
|              |      | 15         | 61.33            | 18.38             | 3,592.74           |
| Ukuma        | 39   | 55         | 13.37            | 13.27             | 2,595.14           |
|              |      | 40         | 18.38            | 17.46             | 3,412.72           |
|              |      | 25         | 29.41            | 26.15             | 5,112.63           |
|              |      | 15         | 49.02            | 40.58             | 7,932.94           |
| Tchicala     | 40   | 55         | 24.83            | 8.70              | 1,700.79           |
|              |      | 40         | 34.14            | 11.44             | 2,236.62           |
|              |      | 25         | 54.62            | 17.14             | 3,350.69           |
|              |      | 15         | 91.04            | 26.59             | 5,199.06           |
| Bailundo     | 41   | 55         | 17.36            | 43.03             | 8,413.12           |
|              |      | 40         | 23.87            | 56.59             | 11,063.62          |

| Municipality | Plot | Hypotheses | <sup>1</sup> ACV | <sup>2</sup> AACV | <sup>3</sup> PAACP |
|--------------|------|------------|------------------|-------------------|--------------------|
|              |      | 25         | 38.20            | 84.78             | 16,574.50          |
|              |      | 15         | 63.66            | 131.55            | 25,717.59          |
| Tchicala     | 42   | 55         | 13.20            | 9.21              | 1,800.18           |
|              |      | 40         | 18.14            | 12.11             | 2,367.32           |
|              |      | 25         | 29.03            | 18.14             | 3,546.50           |
|              |      | 15         | 48.38            | 28.15             | 5,502.88           |
| Ukuma        | 43   | 55         | 10.59            | 12.52             | 2,446.86           |
|              |      | 40         | 14.56            | 16.46             | 3,217.72           |
|              |      | 25         | 23.30            | 24.66             | 4,820.50           |
|              |      | 15         | 38.83            | 38.26             | 7,479.66           |
| Caala        | 44   | 55         | 45.37            | 14.04             | 2,744.76           |
|              |      | 40         | 62.39            | 18.46             | 3,609.48           |
|              |      | 25         | 99.82            | 27.66             | 5,407.39           |
|              |      | 15         | 166.37           | 42.92             | 8,390.31           |
| Bailundo     | 45   | 55         | 21.24            | 8.75              | 1,710.80           |
|              |      | 40         | 29.20            | 11.51             | 2,249.78           |
|              |      | 25         | 46.73            | 17.24             | 3,370.41           |
|              |      | 15         | 77.88            | 26.75             | 5,229.65           |
| Ukuma        | 46   | 55         | 15.63            | 15.10             | 2,951.55           |
|              |      | 40         | 21.49            | 19.85             | 3,881.42           |
|              |      | 25         | 34.38            | 29.74             | 5,814.79           |
|              |      | 15         | 57.30            | 46.15             | 9,022.45           |
| Bailundo     | 47   | 55         | 12.79            | 10.03             | 1,960.64           |
|              |      | 40         | 17.59            | 13.19             | 2,578.33           |
|              |      | 25         | 28.14            | 19.76             | 3,862.61           |
|              |      | 15         | 46.90            | 30.66             | 5,993.37           |
| Londumbale   | 48   | 55         | 13.48            | 10.91             | 2,133.08           |
|              |      | 40         | 18.54            | 14.35             | 2,805.09           |
|              |      | 25         | 29.67            | 21.50             | 4,202.33           |
|              |      | 15         | 49.44            | 33.35             | 6,520.48           |
| Bailundo     | 49   | 55         | 14.12            | 12.95             | 2,532.11           |
|              |      | 40         | 19.42            | 17.03             | 3,329.84           |
|              |      | 25         | 31.07            | 25.52             | 4,988.46           |
|              |      | 15         | 51.78            | 39.59             | 7,740.28           |

<sup>1</sup>ACV by plot, expressed in trees ha<sup>-1</sup> yr<sup>-1</sup>; <sup>2</sup>AACV by plot, expressed in m<sup>3</sup> ha<sup>-1</sup> yr<sup>-1</sup>; <sup>3</sup>PPAACV by plot, expressed in Kg ha<sup>-1</sup> yr<sup>-1</sup>
